# Supplementary material for: Fast and Easy Phage-Tagging and Live/Dead Analysis for the Rapid Monitoring of Bacteriophage Infection
Source: Front Microbiol. 2020 Dec 18;11:602444. doi: 10.3389/fmicb.2020.602444 (PMC7775415; doi:10.3389/fmicb.2020.602444)
Supplement: Supplementary file 2 [file Data_Sheet_2.xlsx]

## Sheet: Fig 1B
	Absorbance
	Before Filtration				After Filtration
wavelength(nm)	SMG (Blank)	SMG-Syto 13	PMBT14	PMBT14-Syto 13	SMG (Blank)	SMG-Syto 13	PMBT14	PMBT14-Syto 13
325	-0.005	0.008	0.114	0.138	0	0.001	0.127	0.129
326	-0.004	0.008	0.114	0.137	0	0.001	0.125	0.127
327	-0.004	0.008	0.114	0.135	0	0.001	0.124	0.125
328	-0.003	0.007	0.113	0.133	0	0.001	0.123	0.124
329	-0.003	0.007	0.113	0.132	0	0.001	0.121	0.122
330	-0.003	0.006	0.112	0.13	0	0.001	0.12	0.12
331	-0.003	0.005	0.112	0.128	0	0.001	0.118	0.118
332	-0.003	0.005	0.111	0.126	0	0.001	0.117	0.117
333	-0.003	0.004	0.11	0.123	0	0.001	0.116	0.115
334	-0.002	0.004	0.109	0.122	0	0.001	0.114	0.113
335	-0.002	0.003	0.108	0.119	0	0.001	0.113	0.111
336	-0.002	0.003	0.107	0.117	0	0	0.111	0.109
337	-0.002	0.002	0.106	0.116	0	0	0.11	0.108
338	-0.002	0.002	0.104	0.114	0	0	0.109	0.106
339	-0.002	0.001	0.103	0.112	0	0	0.107	0.104
340	-0.002	0.001	0.102	0.11	0	0	0.106	0.103
341	-0.002	0.001	0.101	0.108	0	0	0.105	0.101
342	-0.002	0.001	0.1	0.107	0	0	0.103	0.1
343	-0.002	0.001	0.099	0.105	0	0	0.102	0.099
344	-0.001	0	0.098	0.104	0	0	0.101	0.097
345	-0.002	0	0.097	0.102	0	0	0.1	0.096
346	-0.002	0	0.095	0.101	0	0	0.098	0.095
347	-0.001	0	0.094	0.099	0	0	0.097	0.093
348	-0.002	0	0.093	0.098	0	0	0.096	0.092
349	-0.001	0	0.092	0.097	0	0	0.095	0.091
350	-0.001	0	0.091	0.095	0	0	0.094	0.09
351	-0.001	0	0.09	0.094	0	0	0.093	0.088
352	-0.001	0	0.089	0.093	0	0	0.092	0.087
353	-0.001	0	0.089	0.092	0	0	0.091	0.086
354	-0.001	0	0.088	0.091	0	0	0.09	0.085
355	-0.001	-0.001	0.087	0.09	0	0	0.089	0.084
356	-0.001	-0.001	0.086	0.089	0	0	0.088	0.083
357	-0.001	0	0.085	0.088	0	0	0.087	0.082
358	-0.001	-0.001	0.084	0.087	0	0	0.086	0.081
359	-0.001	0	0.084	0.086	0	0	0.085	0.08
360	-0.002	-0.002	0.08	0.083	0	0	0.083	0.079
361	-0.002	-0.002	0.079	0.082	0	0	0.082	0.078
362	-0.002	-0.002	0.078	0.081	0	-0.001	0.081	0.077
363	-0.002	-0.002	0.077	0.08	0	-0.001	0.08	0.076
364	-0.002	-0.002	0.076	0.079	0	-0.001	0.079	0.075
365	-0.002	-0.002	0.075	0.078	0	-0.001	0.079	0.074
366	-0.002	-0.002	0.074	0.077	0	-0.001	0.078	0.074
367	-0.002	-0.002	0.073	0.076	0	-0.001	0.077	0.073
368	-0.002	-0.002	0.073	0.075	0	-0.001	0.076	0.072
369	-0.002	-0.002	0.072	0.074	0	-0.001	0.075	0.071
370	-0.002	-0.001	0.071	0.073	0	-0.001	0.075	0.07
371	-0.001	-0.002	0.07	0.073	0	-0.001	0.074	0.07
372	-0.002	-0.002	0.069	0.072	0	-0.001	0.073	0.069
373	-0.001	-0.002	0.069	0.071	0	-0.001	0.072	0.068
374	-0.001	-0.001	0.068	0.07	0	0	0.071	0.067
375	-0.001	-0.001	0.067	0.07	0	-0.001	0.071	0.067
376	-0.001	-0.001	0.067	0.069	0	-0.001	0.07	0.066
377	-0.002	-0.001	0.066	0.068	0	-0.001	0.069	0.065
378	-0.002	-0.001	0.065	0.067	0	-0.001	0.069	0.065
379	-0.002	-0.001	0.064	0.067	0	-0.001	0.068	0.064
380	-0.001	-0.001	0.064	0.066	0	0	0.067	0.063
381	-0.001	-0.001	0.063	0.065	0	-0.001	0.067	0.063
382	-0.001	-0.001	0.062	0.065	0	-0.001	0.066	0.062
383	-0.001	-0.001	0.062	0.064	0	-0.001	0.065	0.062
384	-0.001	-0.001	0.061	0.064	0	-0.001	0.065	0.061
385	-0.001	-0.001	0.061	0.063	0	-0.001	0.064	0.06
386	-0.001	0	0.06	0.063	0	-0.001	0.064	0.06
387	-0.001	0	0.06	0.062	0	-0.001	0.063	0.059
388	-0.001	0	0.059	0.062	0	-0.001	0.062	0.059
389	-0.001	0	0.059	0.061	0	-0.001	0.062	0.058
390	-0.001	0	0.058	0.061	0	-0.001	0.061	0.058
391	-0.001	0	0.058	0.06	0	-0.001	0.061	0.057
392	-0.001	0.001	0.057	0.06	0	0	0.06	0.057
393	-0.001	0.001	0.057	0.06	0	-0.001	0.06	0.056
394	-0.001	0.001	0.056	0.059	0	0	0.059	0.056
395	-0.001	0.001	0.056	0.059	0	-0.001	0.059	0.055
396	-0.001	0.002	0.056	0.059	0	0	0.058	0.055
397	-0.001	0.002	0.055	0.059	0	-0.001	0.058	0.055
398	-0.001	0.002	0.055	0.059	0	-0.001	0.057	0.054
399	-0.001	0.003	0.055	0.059	0	-0.001	0.057	0.054
400	-0.001	0.003	0.054	0.058	0	0	0.056	0.054
401	-0.001	0.004	0.054	0.058	0	-0.001	0.056	0.054
402	-0.001	0.004	0.053	0.058	0	0	0.055	0.053
403	-0.001	0.004	0.053	0.058	0	0	0.055	0.053
404	-0.001	0.005	0.052	0.058	0	0	0.055	0.053
405	-0.001	0.005	0.052	0.058	0	0	0.054	0.053
406	-0.001	0.006	0.051	0.058	0	0	0.054	0.053
407	-0.001	0.007	0.051	0.058	0	0	0.053	0.052
408	-0.001	0.007	0.051	0.058	0	0	0.053	0.052
409	-0.001	0.008	0.05	0.059	0	0	0.052	0.052
410	-0.001	0.008	0.05	0.059	0	-0.001	0.052	0.052
411	-0.001	0.009	0.049	0.059	0	-0.001	0.051	0.052
412	-0.001	0.01	0.049	0.06	0	0	0.051	0.052
413	-0.001	0.011	0.049	0.06	0	0	0.051	0.052
414	-0.001	0.012	0.048	0.06	0	-0.001	0.05	0.052
415	-0.001	0.013	0.048	0.061	0	0	0.05	0.052
416	-0.001	0.014	0.047	0.062	0	0	0.049	0.052
417	-0.001	0.015	0.047	0.062	0	0	0.049	0.052
418	-0.001	0.016	0.047	0.063	0	0	0.048	0.052
419	-0.001	0.017	0.046	0.064	0	0	0.048	0.052
420	-0.001	0.019	0.047	0.066	0	0	0.047	0.052
421	-0.001	0.021	0.046	0.067	0	-0.001	0.047	0.052
422	-0.001	0.022	0.046	0.068	0	0	0.046	0.053
423	-0.001	0.024	0.045	0.069	0	0	0.045	0.053
424	-0.001	0.026	0.045	0.07	0	0	0.045	0.053
425	-0.001	0.027	0.045	0.072	0	0	0.045	0.054
426	-0.001	0.029	0.044	0.074	0	0	0.044	0.054
427	-0.001	0.031	0.043	0.075	0	0	0.043	0.055
428	-0.001	0.033	0.043	0.077	0	0	0.043	0.055
429	-0.001	0.036	0.043	0.079	0	0	0.042	0.056
430	-0.001	0.038	0.042	0.081	0	0	0.042	0.057
431	-0.001	0.04	0.042	0.083	0	0	0.042	0.057
432	-0.001	0.043	0.041	0.085	0	0	0.041	0.058
433	-0.001	0.045	0.041	0.088	0	0	0.041	0.059
434	0	0.048	0.04	0.09	0	0	0.04	0.06
435	-0.001	0.051	0.04	0.093	0	0	0.04	0.061
436	-0.001	0.054	0.04	0.096	0	0	0.04	0.062
437	-0.001	0.057	0.039	0.098	0	0	0.039	0.063
438	-0.001	0.06	0.039	0.101	0	0	0.039	0.064
439	0	0.063	0.039	0.105	0	0	0.038	0.066
440	0	0.067	0.039	0.108	0	0	0.038	0.067
441	0	0.07	0.038	0.112	0	0	0.038	0.068
442	0	0.075	0.038	0.116	0	0	0.037	0.07
443	0	0.079	0.037	0.121	0	0	0.037	0.072
444	-0.001	0.083	0.037	0.125	0	0	0.037	0.074
445	-0.001	0.088	0.036	0.13	0	0	0.036	0.076
446	-0.001	0.093	0.036	0.136	0	0	0.036	0.079
447	-0.001	0.098	0.035	0.142	0	0	0.036	0.081
448	-0.001	0.103	0.035	0.148	0	0	0.035	0.084
449	-0.001	0.108	0.034	0.155	0	0	0.035	0.087
450	-0.001	0.114	0.034	0.162	0	0	0.035	0.09
451	-0.001	0.119	0.034	0.169	0	0	0.034	0.093
452	-0.001	0.124	0.033	0.177	0	0	0.034	0.097
453	-0.001	0.129	0.033	0.184	0	0	0.034	0.1
454	-0.001	0.134	0.033	0.191	0	0	0.033	0.103
455	-0.001	0.139	0.032	0.198	0	0	0.033	0.106
456	-0.001	0.143	0.032	0.205	0	0	0.033	0.109
457	-0.001	0.148	0.032	0.212	0	0	0.033	0.112
458	-0.001	0.151	0.032	0.218	0	0	0.032	0.115
459	-0.001	0.155	0.031	0.225	0	0	0.032	0.118
460	-0.001	0.159	0.031	0.23	0	0	0.032	0.12
461	-0.001	0.163	0.031	0.235	0	0	0.031	0.122
462	-0.001	0.167	0.031	0.24	0	0	0.031	0.124
463	-0.001	0.17	0.03	0.243	0	0	0.031	0.126
464	-0.001	0.174	0.03	0.247	0	0	0.031	0.127
465	-0.001	0.178	0.03	0.25	0	0	0.031	0.129
466	-0.001	0.181	0.03	0.254	0	0	0.03	0.13
467	-0.001	0.185	0.03	0.257	0	0	0.03	0.131
468	-0.001	0.189	0.03	0.26	0	0	0.03	0.133
469	-0.001	0.193	0.029	0.264	0	0	0.03	0.135
470	-0.001	0.197	0.029	0.268	0	0	0.029	0.137
471	-0.001	0.202	0.029	0.273	0	0	0.029	0.139
472	0	0.206	0.029	0.279	0	0	0.029	0.142
473	0	0.211	0.029	0.285	0	0	0.029	0.145
474	-0.001	0.214	0.029	0.292	0	0	0.028	0.148
475	0	0.218	0.029	0.299	0	0	0.028	0.151
476	0	0.222	0.028	0.307	0	0	0.028	0.156
477	0	0.226	0.028	0.315	0	0	0.028	0.16
478	0	0.229	0.028	0.323	0	0	0.028	0.164
479	0	0.231	0.028	0.332	0	0	0.028	0.168
480	0	0.233	0.028	0.34	0	0	0.028	0.173
481	0	0.234	0.028	0.348	0	0	0.027	0.177
482	0	0.234	0.028	0.355	0	0	0.027	0.18
483	0	0.233	0.027	0.361	0	0	0.027	0.184
484	0	0.231	0.027	0.366	0	0	0.027	0.187
485	0	0.228	0.027	0.369	0	0	0.027	0.189
486	0	0.224	0.027	0.371	0	0	0.026	0.19
487	0	0.22	0.027	0.371	0	0	0.026	0.19
488	0	0.214	0.026	0.368	0	0	0.026	0.189
489	0	0.207	0.026	0.363	0	0	0.026	0.187
490	0	0.2	0.026	0.356	0	0	0.026	0.184
491	0	0.193	0.026	0.348	0	0	0.025	0.179
492	0	0.185	0.026	0.337	0	0	0.025	0.174
493	0	0.176	0.025	0.323	0	0	0.025	0.167
494	0	0.167	0.025	0.308	0	0	0.024	0.159
495	0	0.158	0.025	0.291	0	0	0.024	0.15
496	0	0.15	0.025	0.274	0	0	0.024	0.141
497	0	0.141	0.024	0.256	0	0	0.024	0.132
498	0	0.133	0.024	0.239	0	0	0.024	0.124
499	0	0.125	0.024	0.221	0	0	0.023	0.114
500	0	0.117	0.024	0.203	0	0	0.023	0.105
501	0	0.11	0.024	0.187	0	0	0.023	0.096
502	0	0.103	0.024	0.171	0	0	0.023	0.088
503	0	0.096	0.023	0.157	0	0	0.022	0.081
504	0	0.09	0.023	0.144	0	0	0.022	0.074
505	0	0.083	0.023	0.131	0	0	0.022	0.068
506	0	0.078	0.023	0.12	0	0	0.022	0.062
507	0	0.072	0.023	0.11	0	0	0.022	0.058
508	0	0.068	0.023	0.101	0	0	0.022	0.053
509	0	0.064	0.022	0.094	0	0	0.021	0.05
510	0	0.059	0.022	0.087	0	0	0.021	0.046
511	0	0.055	0.022	0.08	0	0	0.021	0.043
512	0	0.051	0.022	0.075	0	0	0.021	0.041
513	0	0.047	0.022	0.07	0	0	0.021	0.038
514	0	0.044	0.022	0.066	0	0	0.021	0.036
515	0	0.041	0.022	0.062	0	0	0.02	0.034
516	0	0.038	0.022	0.059	0	0	0.02	0.033
517	0	0.035	0.021	0.056	0	0	0.02	0.031
518	0	0.033	0.021	0.053	0	0	0.02	0.03
519	0	0.03	0.021	0.05	0	0	0.02	0.029
520	0	0.028	0.021	0.048	0	0	0.02	0.028
521	0	0.026	0.021	0.046	0	0	0.02	0.027
522	0	0.024	0.021	0.044	0	0	0.019	0.026
523	0	0.022	0.021	0.042	0	0	0.019	0.025
524	0	0.02	0.021	0.04	0	0	0.019	0.024
525	0	0.019	0.02	0.038	0	0	0.019	0.024
526	0	0.017	0.021	0.037	0	0	0.019	0.023
527	0	0.016	0.021	0.036	0	0	0.019	0.023
528	0	0.015	0.02	0.034	0	0	0.019	0.022
529	0	0.014	0.02	0.033	0	0	0.019	0.021
530	0	0.012	0.02	0.032	0	0	0.019	0.021
531	0	0.011	0.02	0.031	0	0	0.018	0.021
532	0	0.01	0.02	0.03	0	0	0.018	0.02
533	0	0.01	0.019	0.028	0	0	0.018	0.02
534	0	0.009	0.019	0.027	0	0	0.018	0.019
535	0	0.008	0.019	0.026	0	0	0.018	0.019
536	0	0.007	0.019	0.026	0	0	0.017	0.019
537	0	0.007	0.018	0.025	0	0	0.017	0.018
538	0	0.006	0.018	0.024	0	0	0.017	0.018
539	0	0.005	0.018	0.023	0	0	0.017	0.018
540	0	0.005	0.018	0.023	0	0	0.017	0.017
541	0	0.005	0.018	0.022	0	0	0.017	0.017
542	0	0.004	0.018	0.022	0	0	0.017	0.017
543	0	0.004	0.018	0.021	0	0	0.017	0.017
544	0	0.004	0.018	0.021	0	0	0.017	0.016
545	0	0.003	0.018	0.021	0	0	0.016	0.016
546	0	0.003	0.018	0.02	0	0	0.016	0.016
547	0	0.003	0.018	0.02	0	0	0.016	0.016
548	0	0.002	0.017	0.02	0	0	0.016	0.016
549	0	0.002	0.017	0.019	0	0	0.016	0.015
550	0	0.002	0.017	0.019	0	0	0.016	0.015
551	0	0.002	0.017	0.019	0	0	0.016	0.015
552	0	0.002	0.017	0.019	0	0	0.016	0.015
553	0	0.002	0.017	0.018	0	0	0.016	0.015
554	0	0.001	0.017	0.018	0	0	0.016	0.015
555	0	0.001	0.017	0.018	0	0	0.015	0.015
556	0	0.001	0.016	0.017	0	0	0.015	0.014
557	0	0.001	0.016	0.017	0	0	0.015	0.014
558	0	0.001	0.016	0.017	0	0	0.015	0.014
559	0	0.001	0.016	0.017	0	0	0.015	0.014
560	0	0.001	0.016	0.016	0	0	0.015	0.014
561	0	0.001	0.016	0.016	0	0	0.015	0.014
562	0	0.001	0.015	0.016	0	0	0.014	0.014
563	0	0.001	0.015	0.016	0	0	0.014	0.014
564	0	0.001	0.015	0.016	0	0	0.014	0.014
565	0	0.001	0.015	0.016	0	0	0.014	0.013
566	0	0.001	0.015	0.016	0	0	0.014	0.013
567	0	0.001	0.015	0.016	0	0	0.014	0.013
568	0	0.001	0.015	0.015	0	0	0.014	0.013
569	0	0.001	0.015	0.015	0	0	0.014	0.013
570	0	0.001	0.015	0.015	0	0	0.014	0.013
571	0	0.001	0.015	0.015	0	0	0.014	0.013
572	0	0.001	0.015	0.015	0	0	0.014	0.013
573	0	0.001	0.015	0.015	0	0	0.013	0.013
574	0	0.001	0.015	0.015	0	0	0.013	0.013
575	0	0.001	0.015	0.015	0	0	0.013	0.013
576	0	0	0.015	0.015	0	0	0.013	0.012
577	0	0.001	0.014	0.015	0	0	0.013	0.012
578	0	0	0.014	0.014	0	0	0.013	0.012
579	0	0	0.014	0.014	0	0	0.013	0.012
580	0	0.001	0.014	0.014	0	0	0.013	0.012
581	0	0	0.014	0.014	0	0	0.013	0.012
582	0	0	0.014	0.014	0	0	0.013	0.012
583	0	0	0.014	0.014	0	0	0.012	0.012
584	0	0	0.014	0.014	0	0	0.012	0.012
585	0	0	0.014	0.014	0	0	0.012	0.011
586	0	0	0.014	0.014	0	0	0.012	0.011
587	0	0	0.014	0.014	0	0	0.012	0.011
588	0	0	0.014	0.013	0	0	0.012	0.011
589	0	0	0.014	0.013	0	0	0.012	0.011
590	0	0	0.013	0.013	0	0	0.012	0.011
591	0	0	0.014	0.013	0	0	0.012	0.011
592	0	0	0.013	0.013	0	0	0.012	0.011
593	0	0	0.013	0.013	0	0	0.012	0.011
594	0	0	0.013	0.013	0	0	0.012	0.011
595	0	0	0.013	0.013	0	0	0.012	0.011
596	0	0	0.013	0.013	0	0	0.012	0.011
597	0	0	0.013	0.013	0	0	0.012	0.011
598	0	0	0.013	0.013	0	0	0.011	0.011
599	0	0.001	0.013	0.013	0	0	0.011	0.011
600	0	0	0.013	0.013	0	0	0.011	0.01
601	0	0	0.013	0.013	0	0	0.011	0.01
602	0	0	0.013	0.012	0	0	0.011	0.01
603	0	0	0.012	0.012	0	0	0.011	0.01
604	0	0	0.012	0.012	0	0	0.011	0.01
605	0	0	0.012	0.012	0	0	0.011	0.01
606	0	0	0.012	0.012	0	0	0.011	0.01
607	0	0	0.012	0.012	0	0	0.011	0.01
608	0	0	0.012	0.012	0	0	0.011	0.01
609	0	0	0.012	0.012	0	0	0.011	0.01
610	0	0	0.012	0.012	0	0	0.011	0.01
611	0	0	0.012	0.012	0	0	0.01	0.01
612	0	0	0.012	0.012	0	0	0.01	0.01
613	0	0	0.012	0.012	0	0	0.01	0.01
614	0	0.001	0.012	0.012	0	0	0.01	0.01
615	0	0	0.012	0.012	0	0	0.01	0.01
616	0	0	0.012	0.012	0	0	0.01	0.009
617	0	0	0.012	0.012	0	0	0.01	0.009
618	0	0	0.012	0.012	0	0	0.01	0.009
619	0	0	0.012	0.011	0	0	0.01	0.009
620	0	0	0.011	0.011	0	0	0.01	0.009
621	0	0	0.011	0.011	0	0	0.01	0.009
622	0	0	0.011	0.011	0	0	0.01	0.009
623	0	0	0.011	0.011	0	0	0.01	0.009
624	0	0	0.011	0.011	0	0	0.01	0.009
625	0	0	0.011	0.011	0	0	0.01	0.009
626	0	0	0.011	0.011	0	0	0.01	0.009
627	0	0	0.011	0.011	0	0	0.01	0.009
628	0	0	0.011	0.011	0	0	0.009	0.009
629	0	0	0.011	0.011	0	0	0.009	0.009
630	0	0	0.011	0.011	0	0	0.009	0.009
631	0	0	0.011	0.011	0	0	0.009	0.009
632	0	0	0.011	0.011	0	0	0.009	0.008
633	0	0	0.011	0.011	0	0	0.009	0.009
634	0	0	0.011	0.011	0	0	0.009	0.008
635	0	0	0.011	0.011	0	0	0.009	0.008
636	0	0	0.011	0.011	0	0	0.009	0.008
637	0	0	0.011	0.011	0	0	0.009	0.008
638	0	0	0.011	0.01	0	0	0.009	0.008
639	0	0	0.011	0.01	0	0	0.009	0.008
640	0	0	0.011	0.01	0	0	0.009	0.008
641	0	0	0.011	0.01	0	0	0.009	0.008
642	0	0	0.01	0.01	0	0	0.009	0.008
643	0	0	0.01	0.01	0	0	0.009	0.008
644	0	0	0.01	0.01	0	0	0.009	0.008
645	0	0	0.01	0.01	0	0	0.009	0.008
646	0	0	0.01	0.01	0	0	0.009	0.008
647	0	0	0.01	0.01	0	0	0.008	0.008
648	0	0	0.01	0.01	0	0	0.008	0.008
649	0	0.001	0.01	0.01	0	0	0.008	0.008
650	0	0	0.01	0.01	0	0	0.008	0.008
651	0	0	0.01	0.01	0	0	0.008	0.008
652	0	0	0.01	0.01	0	0	0.008	0.008
653	0	0	0.01	0.01	0	0	0.008	0.008
654	0	0	0.01	0.01	0	0	0.008	0.007
655	0	0	0.01	0.01	0	0	0.008	0.007
656	0	0	0.01	0.01	0	0	0.008	0.007
657	0	0	0.01	0.01	0	0	0.008	0.007
658	0	0	0.01	0.01	0	0	0.008	0.007
659	0	0	0.01	0.01	0	0	0.008	0.007
660	0	0.001	0.011	0.01	0	0	0.008	0.007
661	0	0	0.01	0.01	0	0	0.008	0.007
662	0	0	0.01	0.009	0	0	0.008	0.007
663	0	0	0.009	0.009	0	0	0.008	0.007
664	0	0	0.008	0.009	0	0	0.008	0.007
665	0	0	0.007	0.008	0	0	0.007	0.007
666	0	0	0.006	0.008	0	0	0.007	0.007
667	0	0	0.005	0.007	0	0	0.007	0.007
668	0	0	0.005	0.007	0	0	0.007	0.007
669	0	0	0.005	0.007	0	0.001	0.007	0.007
670	0	0	0.005	0.007	0	0	0.007	0.007
671	0	0	0.005	0.007	0	0	0.007	0.007
672	0	0	0.005	0.007	0	0	0.007	0.007
673	0	0	0.006	0.008	0	0	0.007	0.007
674	0	0	0.006	0.008	0	0	0.007	0.007
675	0	0	0.007	0.008	0	0	0.007	0.007
676	0	0	0.007	0.008	0	0	0.007	0.007
677	0	0.001	0.008	0.008	0	0	0.007	0.006
678	0	0	0.008	0.008	0	0	0.007	0.006
679	0	0	0.009	0.008	0	0	0.007	0.006
680	0	0	0.009	0.009	0	0	0.007	0.006
681	0	0	0.009	0.009	0	0	0.007	0.006
682	0	0	0.009	0.009	0	0	0.007	0.006
683	0	0	0.009	0.009	0	0	0.007	0.006
684	0	0	0.009	0.009	0	0	0.007	0.006
685	0	0	0.01	0.009	0	0	0.007	0.006
686	0	0	0.009	0.009	0	0	0.007	0.006
687	0	0.001	0.009	0.009	0	0	0.007	0.006
688	0	0	0.009	0.008	0	0	0.007	0.006
689	0	0	0.009	0.008	0	0	0.007	0.006
690	0	0.001	0.009	0.008	0	0	0.007	0.006
691	0	0.001	0.009	0.008	0	0	0.007	0.006
692	0	0	0.009	0.008	0	0	0.007	0.006
693	0	0	0.009	0.008	0	0	0.007	0.006
694	0	0	0.009	0.008	0	0	0.006	0.006
695	0	0.001	0.009	0.008	0	0	0.007	0.006
696	0	0	0.009	0.008	0	0	0.006	0.006
697	0	0.001	0.009	0.008	0	0	0.006	0.006
698	0	0	0.009	0.008	0	0	0.007	0.006
699	0	0	0.009	0.008	0	0	0.006	0.006
700	0	0	0.009	0.008	0	0	0.006	0.006
701	0	0	0.008	0.008	0	0	0.006	0.006
702	0	0	0.009	0.008	0	0	0.006	0.006
703	0	0	0.008	0.008	0	0	0.006	0.006
704	0	0	0.008	0.008	0	0	0.006	0.006
705	0	0	0.008	0.008	0	0	0.006	0.006
706	0	0	0.008	0.008	0	0	0.006	0.006
707	0	0	0.008	0.007	0	0	0.006	0.005
708	0	0	0.008	0.007	0	0	0.006	0.005
709	0	0	0.007	0.007	0	0	0.006	0.006
710	0	0	0.008	0.007	0	0	0.006	0.006
711	0	0	0.008	0.007	0	0	0.006	0.006
712	0	0	0.008	0.007	0	0	0.006	0.006
713	0	0	0.008	0.007	0	0	0.006	0.006
714	0	0	0.008	0.007	0	0	0.006	0.005
715	0	0	0.008	0.007	0	0	0.006	0.006
716	0	0.001	0.008	0.008	0	0	0.006	0.005
717	0	0.001	0.008	0.007	0	0	0.006	0.005
718	0	0	0.008	0.007	0	0	0.006	0.005
719	0	0	0.008	0.007	0	0	0.006	0.005
720	0	0.001	0.008	0.007	0	0	0.006	0.005
721	0	0	0.008	0.007	0	0	0.006	0.005
722	0	0	0.008	0.007	0	0	0.006	0.005
723	0	0	0.008	0.007	0	0	0.006	0.005
724	0	0	0.008	0.007	0	0	0.006	0.005
725	0	0	0.007	0.007	0	0	0.006	0.005
726	0	0	0.007	0.007	0	0	0.006	0.005
727	0	0	0.007	0.007	0	0	0.006	0.005
728	0	0	0.007	0.007	0	0	0.006	0.005
729	0	0	0.007	0.007	0	0	0.005	0.005
730	0	0	0.007	0.007	0	0	0.005	0.005
731	0	0.001	0.007	0.007	0	0	0.005	0.005
732	0	0	0.007	0.007	0	0	0.005	0.005
733	0	0	0.007	0.007	0	0	0.005	0.005
734	0	0	0.007	0.007	0	0	0.005	0.005
735	0	0	0.007	0.007	0	0	0.005	0.005
736	0	0	0.007	0.007	0	0	0.005	0.005
737	0	0	0.007	0.007	0	0	0.005	0.005
738	0	0	0.007	0.007	0	0	0.005	0.005
739	0	0	0.007	0.007	0	0	0.005	0.005
740	0	0	0.007	0.007	0	0	0.005	0.005
741	0	0	0.007	0.007	0	0	0.005	0.005
742	0	0	0.007	0.006	0	0	0.005	0.005
743	0	0	0.007	0.006	0	0	0.005	0.005
744	0	0	0.007	0.006	0	0	0.005	0.004
745	0	0	0.007	0.006	0	0	0.005	0.004
746	0	0	0.007	0.006	0	0	0.005	0.004
747	0	0	0.007	0.006	0	0	0.005	0.004
748	0	0	0.006	0.006	0	0	0.005	0.004
749	0	0	0.006	0.006	0	0	0.005	0.004
750	0	0	0.006	0.006	0	0	0.005	0.004
751	0	0	0.006	0.006	0	0	0.005	0.004
752	0	0	0.006	0.006	0	0	0.005	0.004
753	0	0	0.006	0.006	0	0	0.005	0.004
754	0	0	0.006	0.006	0	0	0.005	0.004
755	0	0	0.006	0.006	0	0	0.005	0.004
756	0	0	0.006	0.006	0	0	0.005	0.004
757	0	0.001	0.006	0.006	0	0	0.005	0.004
758	0	0	0.006	0.006	0	0	0.005	0.004
759	0	0	0.006	0.006	0	0	0.005	0.004
760	0	0	0.006	0.006	0	0	0.005	0.004
761	0	0	0.006	0.006	0	0	0.005	0.004
762	0	0	0.006	0.006	0	0	0.004	0.004
763	0	0	0.006	0.006	0	0	0.005	0.004
764	0	0	0.006	0.006	0	0	0.005	0.004
765	0	0	0.006	0.006	0	0	0.005	0.004
766	0	0	0.006	0.006	0	0	0.005	0.004
767	0	0	0.006	0.006	0	0	0.004	0.004
768	0	0	0.006	0.006	0	0	0.004	0.004
769	0	0	0.006	0.006	0	0	0.004	0.004
770	0	0	0.006	0.006	0	0	0.004	0.004
771	0	0	0.006	0.006	0	0	0.004	0.004
772	0	0	0.006	0.006	0	0	0.004	0.004
773	0	0	0.005	0.006	0	0	0.004	0.004
774	0	0	0.005	0.005	0	0	0.004	0.004
775	0	0	0.005	0.005	0	0	0.004	0.004
776	0	0	0.005	0.005	0	0	0.004	0.004
777	0	0	0.005	0.005	0	0	0.004	0.004
778	0	0	0.005	0.005	0	0	0.004	0.004
779	0	0	0.005	0.006	0	0	0.004	0.004
780	0	0	0.005	0.006	0	0	0.004	0.004
781	0	0	0.005	0.006	0	0	0.004	0.004
782	0	0	0.005	0.005	0	0	0.004	0.004
783	0	0	0.005	0.005	0	0	0.004	0.004
784	0	0	0.005	0.005	0	0	0.004	0.004
785	0	0	0.005	0.005	0	0	0.004	0.004
786	0	0	0.005	0.005	0	0	0.004	0.004
787	0	0	0.005	0.005	0	0	0.004	0.004
788	0	0	0.005	0.005	0	0	0.004	0.004
789	0	0	0.005	0.005	0	0	0.004	0.003
790	0	0	0.005	0.005	0	0	0.004	0.004
791	0	0	0.005	0.005	0	0	0.004	0.004
792	0	0	0.005	0.005	0	0	0.004	0.004
793	0	0	0.005	0.005	0	0	0.004	0.004
794	0	0	0.005	0.005	0	0	0.004	0.004
795	0	0	0.005	0.005	0	0	0.004	0.004
796	0	0	0.005	0.005	0	0	0.004	0.004
797	0	0	0.005	0.005	0	0	0.004	0.004
798	0	0	0.005	0.005	0	0	0.004	0.003
799	0	0	0.005	0.005	0	0	0.004	0.004
800	0	0	0.005	0.005	0	0	0.004	0.003
801	0	0	0.005	0.005	0	0	0.004	0.003
802	0	0	0.005	0.005	0	0	0.004	0.003
803	0	0	0.005	0.005	0	0	0.004	0.003
804	0	0	0.005	0.005	0	0	0.004	0.003
805	0	0	0.005	0.005	0	0	0.004	0.003
806	0	0	0.005	0.005	0	0	0.004	0.003
807	0	0	0.005	0.005	0	0	0.004	0.003
808	0	0	0.005	0.005	0	0	0.004	0.003
809	0	0	0.005	0.005	0	0	0.004	0.003
810	0	0	0.005	0.005	0	0	0.004	0.003
811	0	0	0.005	0.005	0	0	0.004	0.003
812	0	0	0.005	0.005	0	0	0.004	0.003
813	0	0	0.005	0.005	0	0	0.004	0.003
814	0	0	0.005	0.005	0	0	0.004	0.003
815	0	0	0.005	0.005	0	0	0.003	0.003
816	0	0	0.005	0.005	0	0	0.004	0.003
817	0	0	0.004	0.005	0	0	0.004	0.003
818	0	0	0.004	0.005	0	0	0.004	0.003
819	0	0	0.004	0.005	0	0	0.004	0.003
820	0	0	0.004	0.005	0	0	0.003	0.003
821	0	0	0.004	0.005	0	0	0.003	0.003
822	0	0	0.004	0.005	0	0	0.003	0.003
823	0	0	0.004	0.005	0	0	0.003	0.003
824	0	0	0.004	0.004	0	0	0.003	0.003
825	0	0	0.004	0.005	0	0	0.003	0.003
826	0	0	0.004	0.005	0	0	0.003	0.003
827	0	0	0.004	0.005	0	0	0.003	0.003
828	0	0	0.004	0.005	0	0	0.003	0.003
829	0	0	0.004	0.005	0	0	0.003	0.003
830	0	0	0.004	0.005	0	0	0.003	0.003
831	0	0	0.004	0.005	0	0	0.003	0.003
832	0	0	0.004	0.005	0	0	0.003	0.003
833	0	0	0.004	0.005	0	0	0.003	0.003
834	0	0	0.004	0.005	0	0	0.003	0.003
835	0	0	0.005	0.005	0	0	0.003	0.003
836	0	0	0.005	0.005	0	0	0.003	0.003
837	0	0	0.005	0.005	0	0	0.003	0.003
838	0	0	0.005	0.005	0	0	0.003	0.003
839	0	0.001	0.005	0.005	0	0	0.003	0.003
840	0	0	0.005	0.005	0	0	0.003	0.003
841	0	0	0.004	0.005	0	0	0.003	0.003
842	0	0.001	0.005	0.005	0	0	0.003	0.003
843	0	0.001	0.004	0.005	0	0	0.003	0.003
844	0	0	0.005	0.005	0	0	0.003	0.003
845	0	0.001	0.004	0.005	0	0	0.003	0.003
846	0	0.001	0.004	0.005	0	0	0.003	0.003
847	0	0	0.004	0.005	0	0	0.003	0.003
848	0	0.001	0.004	0.005	0	0	0.003	0.003
849	0	0.001	0.005	0.005	0	0	0.003	0.003
850	0	0	0.005	0.005	0	0	0.003	0.003
851	0	0.001	0.005	0.005	0	0	0.003	0.003
852	0	0.001	0.005	0.005	0	0	0.003	0.003
853	0	0.001	0.004	0.005	0	0	0.003	0.003
854	0	0	0.005	0.004	0	0	0.003	0.003
855	0	0.001	0.005	0.004	0	0	0.003	0.003
856	0	0.001	0.005	0.005	0	0	0.003	0.003
857	0	0.001	0.005	0.005	0	0	0.003	0.003
858	0	0.001	0.005	0.005	0	0	0.003	0.003
859	0	0.001	0.005	0.005	0	0	0.003	0.003
860	0	0.001	0.005	0.005	0	0	0.003	0.003
861	0	0.001	0.005	0.005	0	0	0.003	0.003
862	0	0.001	0.005	0.005	0	0	0.003	0.003
863	0	0.001	0.005	0.005	0	0	0.003	0.003
864	0	0.001	0.005	0.005	0	0	0.003	0.003
865	0	0.001	0.005	0.005	0	0	0.003	0.003
866	0	0.001	0.005	0.005	0	0	0.003	0.003
867	0	0.001	0.005	0.005	0	0	0.003	0.002
868	0	0.001	0.005	0.005	0	0	0.003	0.002
869	0	0.001	0.005	0.005	0	0	0.003	0.003
870	0	0.001	0.005	0.005	0	0	0.003	0.003
871	0	0.001	0.005	0.005	0	0	0.003	0.003
872	0	0.001	0.005	0.005	0	0	0.003	0.002
873	0	0.001	0.005	0.005	0	0	0.003	0.002
874	0	0.001	0.005	0.005	0	0	0.003	0.002
875	0	0.001	0.005	0.005	0	0	0.003	0.002
876	0	0.001	0.005	0.005	0	0	0.003	0.002
877	0	0.001	0.005	0.005	0	0	0.003	0.002
878	0	0.001	0.005	0.005	0	0	0.003	0.003
879	0	0.001	0.005	0.005	0	0	0.003	0.002
880	0	0.001	0.005	0.005	0	0	0.003	0.003
881	0	0.001	0.005	0.005	0	0	0.003	0.002
882	0	0.001	0.005	0.005	0	0	0.003	0.002
883	0	0.001	0.005	0.005	0	0	0.003	0.002
884	0	0.001	0.005	0.005	0	0	0.003	0.002
885	0	0.001	0.005	0.005	0	0	0.003	0.002
886	0	0.001	0.005	0.005	0	0	0.003	0.002
887	0	0.001	0.005	0.005	0	0	0.003	0.002
888	0	0.001	0.005	0.005	0	0	0.003	0.002
889	0	0.001	0.005	0.005	0	0	0.003	0.002
890	0	0.001	0.005	0.005	0	0	0.003	0.002
891	0	0.001	0.005	0.005	0	0	0.003	0.003
892	0	0.001	0.005	0.005	0	0	0.003	0.002
893	0	0.001	0.005	0.005	0	0	0.003	0.002
894	0	0.001	0.005	0.005	0	0	0.003	0.002
895	0	0.001	0.005	0.005	0	0	0.003	0.002
896	0	0.001	0.005	0.005	0	0	0.003	0.002
897	0	0.001	0.005	0.005	0	0	0.003	0.002
898	0	0.001	0.005	0.005	0	0	0.003	0.002
899	0	0.001	0.005	0.005	0	0	0.003	0.002
900	0	0.001	0.005	0.005	0	0	0.003	0.002
901	0	0.001	0.005	0.005	0	0	0.003	0.002
902	0	0.001	0.005	0.005	0	0	0.003	0.002
903	0	0.001	0.005	0.005	0	0	0.003	0.002
904	0	0.001	0.005	0.005	0	0	0.003	0.002
905	0	0.001	0.005	0.005	0	0	0.003	0.002
906	0	0.001	0.005	0.005	0	0	0.003	0.002
907	0	0.001	0.005	0.005	0	0	0.003	0.002
908	0	0.001	0.005	0.005	0	0	0.003	0.002
909	0	0.001	0.005	0.005	0	0	0.003	0.002
910	0	0.001	0.005	0.005	0	0	0.003	0.002
911	0	0.001	0.005	0.005	0	0	0.003	0.002
912	0	0.001	0.005	0.005	0	0	0.003	0.002
913	0	0.001	0.005	0.005	0	0	0.003	0.002
914	0	0.001	0.005	0.005	0	0	0.003	0.002
915	0	0.001	0.005	0.005	0	0	0.003	0.002
916	0	0.001	0.005	0.005	0	0	0.003	0.002
917	0	0.001	0.005	0.005	0	0	0.002	0.002
918	0	0.001	0.005	0.005	0	0	0.003	0.002
919	0	0.001	0.005	0.005	0	0	0.002	0.002
920	0	0.001	0.005	0.005	0	0	0.003	0.002
921	0	0.001	0.005	0.005	0	0	0.003	0.002
922	0	0.001	0.005	0.005	0	0	0.002	0.002
923	0	0.001	0.005	0.005	0	0	0.003	0.002
924	0	0.001	0.005	0.005	0	0	0.003	0.002
925	0	0.001	0.005	0.005	0	0	0.003	0.002
926	0	0.001	0.005	0.005	0	0	0.002	0.002
927	0	0.001	0.005	0.005	0	0	0.003	0.002
928	0	0.001	0.005	0.005	0	0	0.002	0.002
929	0	0.001	0.006	0.005	0	0	0.002	0.002
930	0	0.001	0.005	0.005	0	0	0.002	0.002
931	0	0.001	0.005	0.005	0	0	0.003	0.002
932	0	0.001	0.005	0.005	0	0	0.002	0.002
933	0	0.001	0.006	0.005	0	0	0.002	0.002
934	0	0.001	0.005	0.005	0	0	0.002	0.002
935	0	0.001	0.005	0.004	0	0	0.002	0.002
936	0	0.001	0.005	0.005	0	0	0.002	0.002
937	0	0.001	0.005	0.004	0	0	0.002	0.002
938	0	0.001	0.005	0.004	0	0	0.002	0.001
939	0	0.001	0.005	0.004	0	0	0.002	0.002
940	0	0.001	0.005	0.004	0	0	0.002	0.002
941	0	0.001	0.005	0.004	0	0	0.002	0.002
942	0	0.001	0.005	0.004	0	0	0.002	0.001
943	0	0.001	0.005	0.004	0	0	0.002	0.001
944	0	0.001	0.005	0.004	0	0	0.002	0.001
945	0	0.001	0.005	0.004	0	0	0.002	0.001
946	0	0.001	0.005	0.004	0	-0.001	0.002	0.001
947	0	0.001	0.005	0.004	0	-0.001	0.002	0.001
948	0	0.001	0.005	0.004	0	-0.001	0.002	0.001
949	0	0	0.005	0.004	0	-0.001	0.002	0.001
950	0	0	0.005	0.004	0	-0.001	0.002	0.001
951	0	0.001	0.005	0.004	0	-0.001	0.002	0.001
952	0	0.001	0.005	0.004	0	-0.001	0.002	0.001
953	0	0	0.005	0.004	0	-0.001	0.002	0.001
954	0	0	0.005	0.004	0	-0.001	0.002	0.001
955	0	0.001	0.005	0.004	0	-0.001	0.002	0.001
956	0	0	0.005	0.004	0	-0.001	0.002	0.001
957	0	0	0.005	0.004	0	-0.001	0.002	0.001
958	0	0	0.005	0.004	0	-0.001	0.002	0.001
959	0	0	0.005	0.004	0	-0.001	0.002	0.001
960	0	0	0.005	0.004	0	-0.001	0.002	0.001
961	0	0	0.005	0.004	0	-0.001	0.002	0.001
962	0	0	0.005	0.004	0	-0.001	0.002	0.001
963	0	0	0.005	0.004	0	-0.001	0.002	0.001
964	0	0	0.005	0.003	0	-0.001	0.002	0.001
965	0	0	0.005	0.003	0	-0.001	0.002	0.001
966	0	0	0.005	0.003	0	-0.001	0.002	0.001
967	0	0	0.005	0.003	0	-0.001	0.002	0.001
968	0	0	0.005	0.003	0	-0.001	0.002	0.001
969	0	0	0.004	0.003	0	-0.001	0.002	0.001
970	0	0	0.004	0.003	0	-0.001	0.002	0.001
971	0	0	0.004	0.003	0	-0.001	0.002	0.001
972	0	0	0.004	0.003	0	-0.001	0.002	0.001
973	0	0	0.004	0.003	0	-0.001	0.002	0.001
974	0	0	0.004	0.003	0	-0.001	0.002	0.001
975	0	0	0.004	0.003	0	-0.001	0.002	0.001
976	0	0	0.004	0.003	0	-0.001	0.002	0.001
977	0	0	0.004	0.003	0	-0.001	0.002	0.001
978	0	0	0.004	0.003	0	-0.001	0.002	0.001
979	0	0	0.004	0.003	0	0	0.002	0.001
980	0	0	0.004	0.003	0	0	0.002	0.001
981	0	0	0.004	0.003	0	0	0.002	0.001
982	0	0.001	0.004	0.003	0	0	0.002	0.001
983	0	0	0.004	0.003	0	0	0.002	0.001
984	0	0	0.003	0.003	0	0	0.002	0.001
985	0	0	0.003	0.003	0	0	0.002	0.001
986	0	0	0.003	0.003	0	0	0.002	0.001
987	0	0	0.003	0.003	0	0	0.002	0.001
988	0	0	0.003	0.003	0	0	0.002	0.001
989	0	0	0.003	0.003	0	0	0.002	0.001
990	0	0	0.003	0.003	0	0	0.002	0.001
991	0	0	0.003	0.003	0	0	0.002	0.001
992	0	0	0.003	0.003	0	0	0.002	0.001
993	0	0	0.003	0.003	0	0	0.002	0.001
994	0	0	0.003	0.003	0	0	0.002	0.001
995	0	0	0.003	0.003	0	0	0.002	0.001
996	0	0	0.003	0.003	0	0	0.002	0.001
997	0	0	0.002	0.003	0	0	0.002	0.001
998	0	0	0.002	0.003	0	0	0.002	0.001
999	0	0	0.002	0.003	0	0	0.002	0.001
1000	0	0	0.002	0.003	0	0	0.002	0.001
1001	0	0	0.002	0.003	0	0	0.001	0.001
1002	0	0	0.002	0.003	0	0	0.001	0.001
1003	0	0	0.002	0.002	0	0	0.001	0.001
1004	0	0	0.002	0.002	0	0	0.001	0.001
1005	0	0	0.002	0.002	0	0	0.001	0.001
1006	0	0	0.001	0.002	0	0	0.001	0.001
1007	0	0	0.001	0.002	0	0	0.001	0.001
1008	0	0	0.001	0.002	0	0	0.001	0.001
1009	0	0	0.001	0.002	0	0	0.001	0.001
1010	0	0	0.001	0.002	0	0	0.001	0.001
1011	0	0	0.001	0.002	0	0	0.001	0.001
1012	0	0	0.001	0.002	0	0	0.001	0.001
1013	0	0	0.001	0.002	0	0	0.001	0.001
1014	0	0	0.001	0.002	0	0	0.001	0.001
1015	0	0	0	0.002	0	0	0.001	0.001
1016	0	0	0	0.002	0	0	0.001	0.001
1017	0	0	0	0.002	0	0	0.001	0.001
1018	0	0	0	0.002	0	0	0.001	0.001
1019	0	0	0	0.002	0	0	0.001	0.001
1020	0	0	0	0.002	0	0	0.001	0.001
1021	0	0	0	0.002	0	0	0.001	0.001
1022	0	0	0	0.002	0	0	0.001	0.001
1023	0	0	0	0.002	0	0	0.001	0.001
1024	0	0	-0.001	0.002	0	0	0.001	0.001
1025	0	0	-0.001	0.001	0	0	0.001	0.001
1026	0	0	-0.001	0.001	0	0	0.001	0.001
1027	0	0	-0.001	0.001	0	0	0.001	0.001
1028	0	0	-0.001	0.001	0	0	0.001	0.001
1029	0	0	-0.001	0.001	0	0	0.001	0.001
1030	0	0	-0.001	0.001	0	0	0.001	0.001
1031	0	0	-0.001	0.001	0	0	0.001	0.001
1032	0	0	-0.002	0.001	0	0	0.001	0.001
1033	0	0	-0.002	0.001	0	-0.001	0.001	0.001
1034	0	0	-0.002	0.001	0	0	0.001	0.001
1035	0	0	-0.002	0.001	0	-0.001	0.001	0.001
1036	0	0	-0.002	0.001	0	-0.001	0.001	0.001
1037	0	0	-0.002	0.001	0	-0.001	0.001	0.001
1038	0	0	-0.002	0.001	0	-0.001	0.001	0.001
1039	0	0	-0.002	0.001	-0.001	-0.001	0.001	0.001
1040	0	0	-0.003	0.001	-0.001	-0.001	0.001	0.001
1041	0	0	-0.003	0.001	-0.001	-0.001	0.001	0.001
1042	0	0	-0.003	0.001	-0.001	-0.001	0.001	0
1043	0	0	-0.003	0.001	-0.001	-0.001	0	0
1044	0	0	-0.003	0.001	-0.001	-0.001	0	0
1045	0	0	-0.003	0.001	-0.001	-0.001	0	0
1046	0	0	-0.003	0.001	-0.001	-0.001	0	0
1047	0	0	-0.003	0.001	-0.001	-0.001	0	0
1048	0	0	-0.004	0.001	-0.001	-0.001	0	0
1049	0	0	-0.004	0.001	-0.001	-0.001	0	0
1050	0	0	-0.004	0.001	-0.001	-0.001	0	0
1051	0	0	-0.004	0.001	-0.001	-0.001	0	0
1052	0	0	-0.004	0	-0.001	-0.001	0	0
1053	0	0	-0.004	0	-0.001	-0.001	0	0
1054	0	0	-0.004	0	-0.001	-0.001	0	0
1055	0	0	-0.004	0	-0.001	-0.001	0	0
1056	0	0	-0.005	0	-0.001	-0.001	0	0
1057	0	0	-0.005	0	-0.001	-0.001	0	0
1058	0	0	-0.005	0	-0.001	-0.001	0	0
1059	0	0	-0.005	0	-0.001	-0.001	0	0
1060	0	0	-0.005	0	-0.001	-0.001	0	0
1061	0	0	-0.005	0	-0.001	-0.001	0	0
1062	0	0	-0.005	0	-0.001	-0.001	0	0
1063	0	0	-0.005	0	-0.001	-0.001	0	0
1064	0	0	-0.005	0	-0.001	-0.001	0	0
1065	0	0	-0.005	0	-0.001	-0.001	0	0
1066	0	0	-0.005	0	-0.001	-0.001	0	0
1067	0	0	-0.005	0	-0.001	-0.001	0	0
1068	0	0	-0.005	0	-0.001	-0.001	0	0
1069	0	0	-0.005	0	-0.001	-0.001	0	0
1070	0	0	-0.005	0	-0.001	-0.001	0	0
1071	0	0	-0.005	0	-0.001	-0.001	0	0
1072	0	0	-0.005	0	-0.001	-0.001	0	0
1073	0	0	-0.005	0	-0.001	-0.001	0	0
1074	0	0	-0.005	0	-0.001	-0.001	0	0
1075	0	0	-0.005	0	-0.001	-0.001	0	0
1076	0	0	-0.005	0	-0.001	-0.001	0	0
1077	0	0	-0.005	0	-0.001	-0.001	0	0
1078	0	-0.001	-0.005	0	-0.001	-0.001	0	0
1079	0	-0.001	-0.005	0	-0.001	-0.001	0	0
1080	0	-0.001	-0.005	0	-0.001	-0.001	0	0
1081	0	-0.001	-0.005	-0.001	-0.001	-0.001	0	0
1082	0	-0.001	-0.005	-0.001	-0.001	-0.001	0	-0.001
1083	0	-0.001	-0.005	-0.001	-0.001	-0.001	0	-0.001
1084	0	-0.001	-0.005	-0.001	-0.001	-0.001	0	-0.001
1085	0	-0.001	-0.005	-0.001	-0.001	-0.001	0	-0.001
1086	0	-0.001	-0.005	-0.001	-0.001	-0.001	0	-0.001
1087	0	-0.001	-0.006	-0.001	-0.001	-0.001	0	-0.001
1088	0	-0.001	-0.006	-0.001	-0.001	-0.001	-0.001	-0.001
1089	0	-0.001	-0.006	-0.001	-0.001	-0.001	-0.001	-0.001
1090	0	-0.001	-0.006	-0.001	-0.001	-0.001	-0.001	-0.001
1091	0	-0.001	-0.006	-0.001	-0.001	-0.001	-0.001	-0.001
1092	0	-0.001	-0.006	-0.001	-0.001	-0.001	-0.001	-0.001
1093	0	-0.001	-0.006	-0.001	-0.001	-0.001	-0.001	-0.001
1094	0	-0.001	-0.006	-0.001	-0.001	-0.001	-0.001	-0.001
1095	0	-0.001	-0.007	-0.001	-0.001	-0.001	-0.001	-0.001
1096	0	-0.001	-0.007	-0.001	-0.001	-0.001	-0.001	-0.001
1097	0	-0.001	-0.007	-0.001	-0.001	-0.001	-0.001	-0.001
1098	0	-0.001	-0.007	-0.002	-0.001	-0.001	0	0
1099	0	-0.001	-0.007	-0.002	-0.001	-0.001	0	-0.001
1100	0	-0.001	-0.007	-0.002	-0.001	-0.001	0	0

## Sheet: Fig 3A
x10E7 PFU /mL
Blank (No Bacteria)	A. johnsonii L2-215	P. fluorescens DSM50090
1.27	0.78	0.91
1.2	0.97	1.02
1.1	0.88	0.92
1.21	1.02	0.86
1.1	1.2	0.91
0.95	0.98	0.64
1.1	1.43	0.3
1.2	1.55	0.57
1.09	1.14	0.21
1.18	0.92	0.74
1.61	0.86	0.94
1.83	1.21	0.56

## Sheet: Fig 3C
P. fluorescens DSM 50090			A. johnsonii L2-215
0.1% NaN3	0.01% NaN3	0% NaN3	0.1% NaN3	0.01% NaN3	0% NaN3
35.6	177.55	168.08	128.63	79.9	95.68
35.19	179.88	173.24	130.27	76.77	97.41
35.33	183.28	185.78	128.87	76.84	98.12

## Sheet: Fig 4B+C
Bacteria / mL	P. fluorescens DSM 500090		P. fluorescens L1-82		A. johnsonii L2-215		E. coli ATCC 25922
	No Phage	+PMBT14	No Phage	+PMBT14	No Phage	+PMBT14	No Phage	+PMBT14
CFU	25400000	4.5e+06	16300000	19000000	175000000	123000000	187000000	244000000
	21300000	5500000	11100000	23100000	112000000	176000000	71000000	292000000
	16400000	4900000	12700000	13700000	208000000	156000000	163000000	207000000
Live	35000000	10500000	19000000	21200000	26100000	27300000	59300000	59600000
	36000000	18800000	21500000	22700000	27500000	28100000	54900000	59800000
	29700000	15400000	20700000	21600000	27100000	31100000	53300000	59400000
Dying	480000	1080000	170000	190000	28400000	25700000	510000	390000
	400000	1.73e+06	120000	180000	26000000	23200000	430000	530000
	500000	1760000	150000	160000	25900000	23200000	440000	480000
Dead	140000	2660000	10000	20000	0	0	50000	50000
	150000	3220000	10000	0	20000	20000	70000	20000
	60000	3170000	0	10000	30000	10000	80000	80000

## Sheet: Supp Fig 1
	DNA amount	Blank	5 ng	25 ng	50 ng
	PMBT14 Syto 13 No filtration	36159.7	38194.7	41955.7	45485.7
		35811.7	37742.7	40933.7	46400.7
		35504.7	37104.7	41578.7	46183.7
		37500.3	39680.3	41385.3	49155.3
		37482.3	38991.3	42248.3	48237.3
		36931.3	38313.3	43590.3	47165.3
	PMBT14 Syto 13 0.45 µm filtration	16114.7	17784.7	19095.7	18808.7
		14353.7	18341.7	18638.7	20897.7
		16752.7	17928.7	16973.7	19077.7
		14909.3	15950.3	17831.3	18911.3
		15356.3	15933.3	17046.3	19656.3
		15395.3	16742.3	17436.3	19762.3
	PMBT14 Syto 13 0.45 µm filtration 0.2 µm filtration	7358.67	7620.67	8727.67	8660.67
		7136.67	7650.67	8552.67	8869.67
		7045.67	7737.67	8965.67	8605.67
		6999.33	7714.33	8034.33	8562.33
		6821.33	7074.33	7769.33	8670.33
		7017.33	7568.33	7757.33	8681.33
	PMBT14 Syto 13 0.45 µm filtration Heat Lysis	71891.7	70761.7	69164.7	69347.7
		73319.7	68208.7	67847.7	67742.7
		69730.7	68009.7	66809.7	68645.7
		59573.3	62519.3	62608.3	62986.3
		55200.3	62207.3	59814.3	55057.3
		57050.3	60241.3	60541.3	60744.3
	SMGT Syto 13 No filtration	1516.67	1431.67	4723.67	9431.67
		683.667	1487.67	4342.67	8079.67
		680.667	1446.67	4593.67	8640.67
		777.333	2031.33	5497.33	12139.3
		743.333	1593.33	5406.33	10758.3
		821.333	1622.33	5305.33	9133.33
	SMGT Syto 13 0.45 µm filtration	31.6667	60.6667	19.6667	269.667
		90.6667	120.667	275.667	182.667
		153.667	136.667	140.667	159.667
		332.333	158.333	165.333	341.333
		117.333	109.333	222.333	335.333
		628.333	192.333	319.333	623.333

## Sheet: Table 1
Dye	Filter	PFU /mL
no dye	none	367000000000
no dye	none	396000000000
no dye	none	380000000000
no dye	0.2 µm	391000000000
no dye	0.2 µm	399000000000
no dye	0.2 µm	398000000000
no dye	0.45 µm	391000000000
no dye	0.45 µm	440000000000
no dye	0.45 µm	479000000000
S13	none	393000000000
S13	none	454000000000
S13	none	431000000000
s13	0.2 µm	429000000000
S13	0.2 µm	480000000000
S13	0.2 µm	473000000000
S13	0.45 µm	333000000000
S13	0.45 µm	346000000000
S13	0.45 µm	353000000000
